# Supplementary material for: High-speed two-color scanning volumetric laser-induced fluorescence
Source: Springer Nature journal article supplement (doi:10.1007/s00348-024-03831-y), 2024-06-21
Supplement: 348_2024_3831_MOESM4_ESM.pdf [file 348_2024_3831_MOESM4_ESM.pdf]

## 10 Supplementary information

Supplementary movie captions are provided in this section.

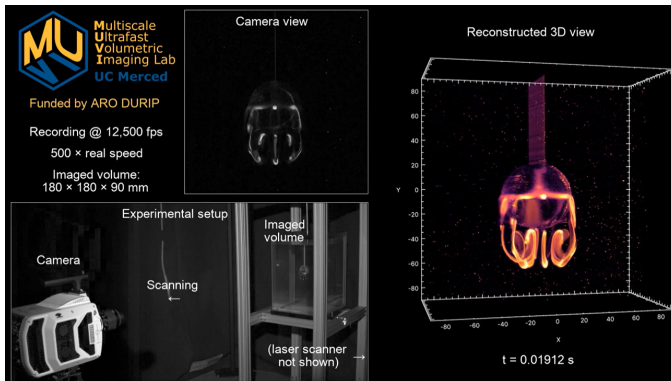

**Fig. 14 Supplementary Movie S1.** A movie displaying the experimental set up, the frames captured by the camera, and the reconstructed volumes.

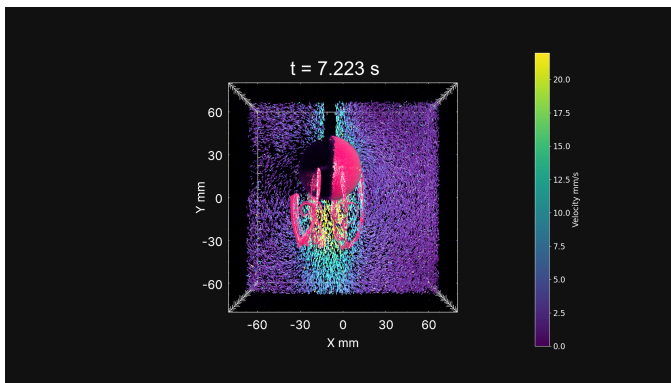

**Fig. 15 Supplementary Movie S2.** A movie of raw data of an isosurface of fluorescent dye overlaid with the PTV velocity field. Measurements are taken at  $Re = 400$ .

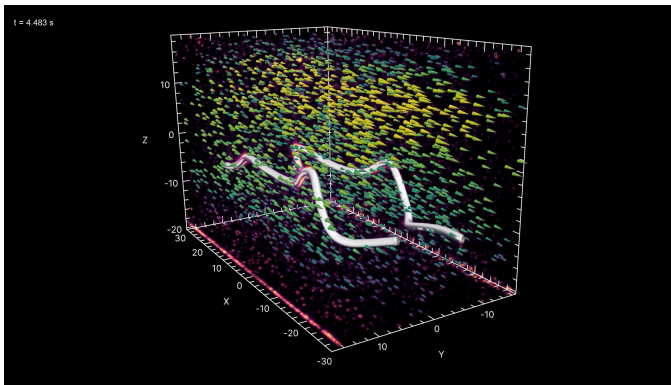

**Fig. 16 Supplementary Movie S3.**A movie of the vortex line tracking of the dye superimposed with PTV tracks for vortices in a pipe flow.
